# Supplementary material
Source: MDPI journal article supplement (https://www.mdpi.com/2071-1050/13/21/11807)

Study S1: Participant flow chart study 1

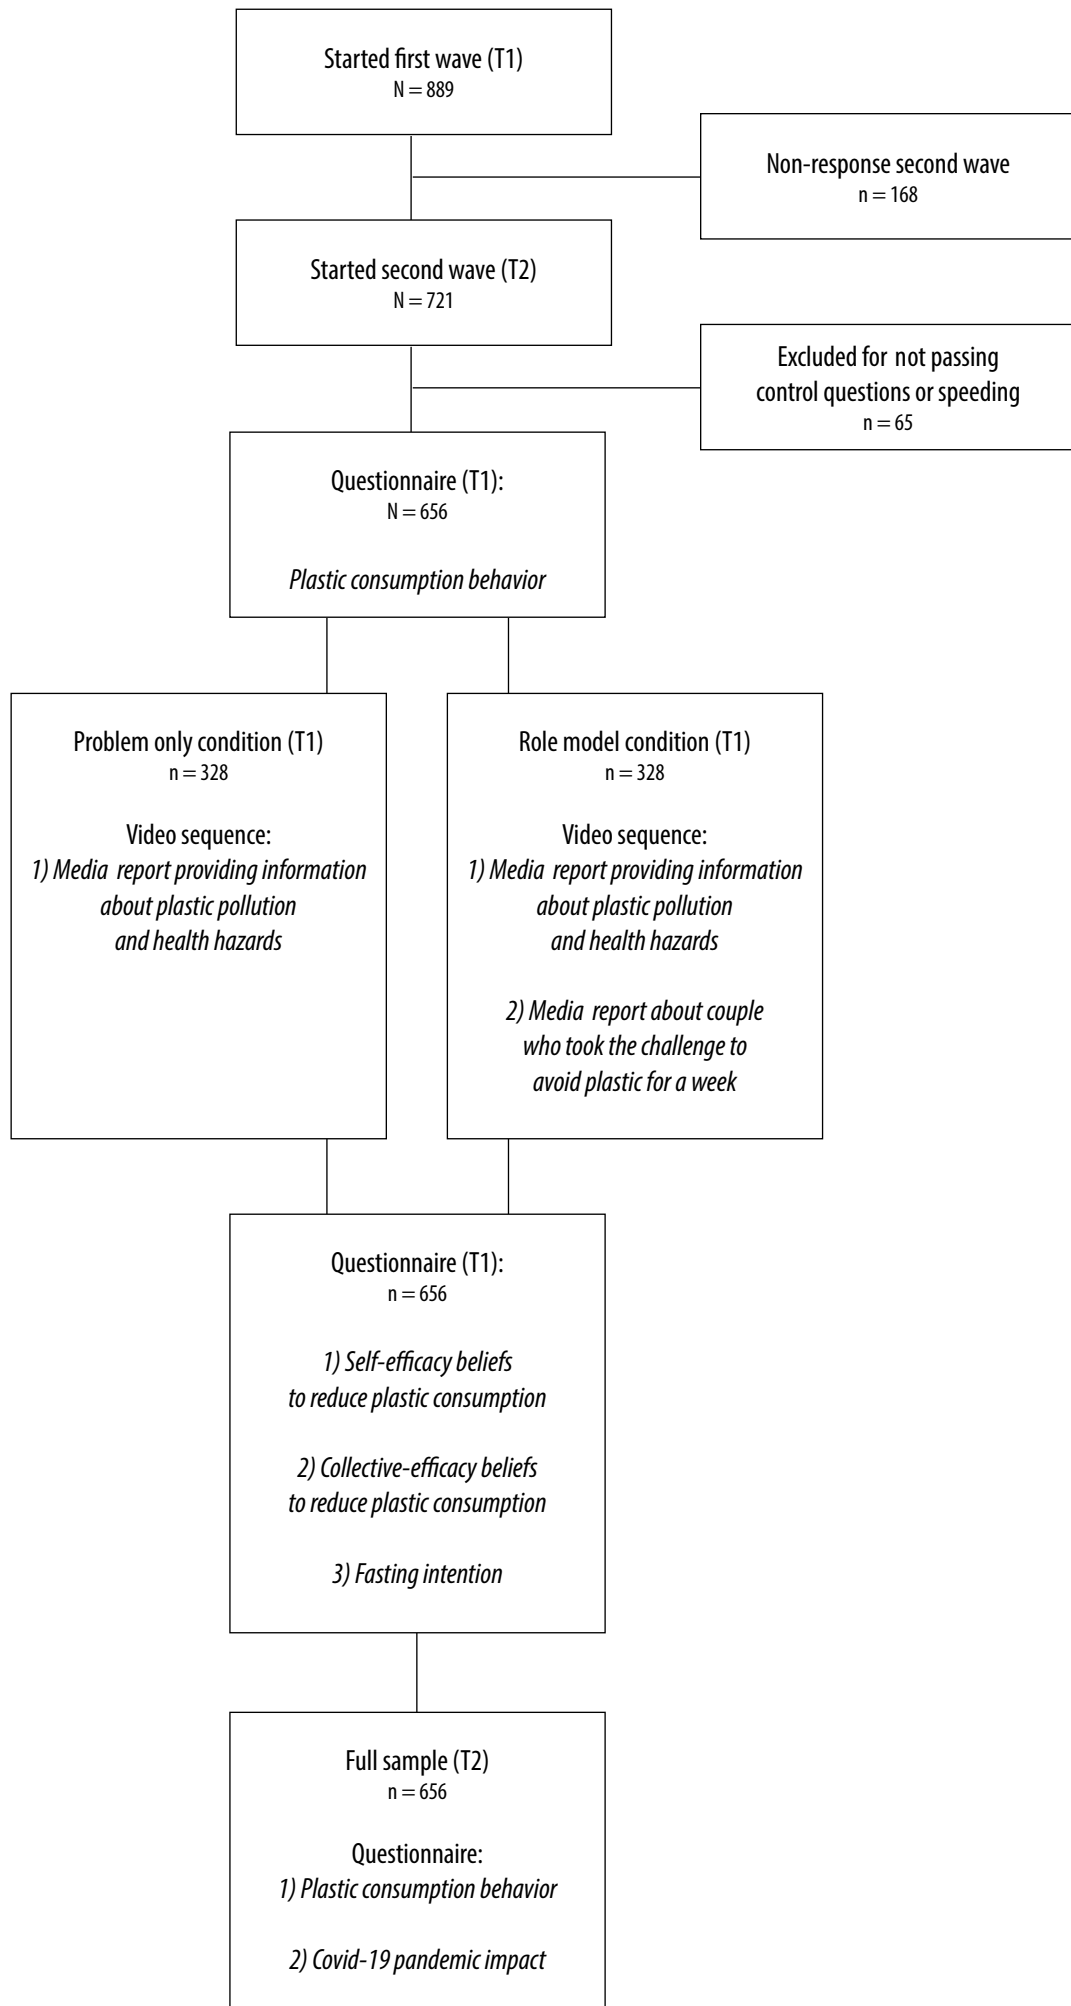

Supplement: s1 [file s1]

Study S2: Participant flow chart study 2

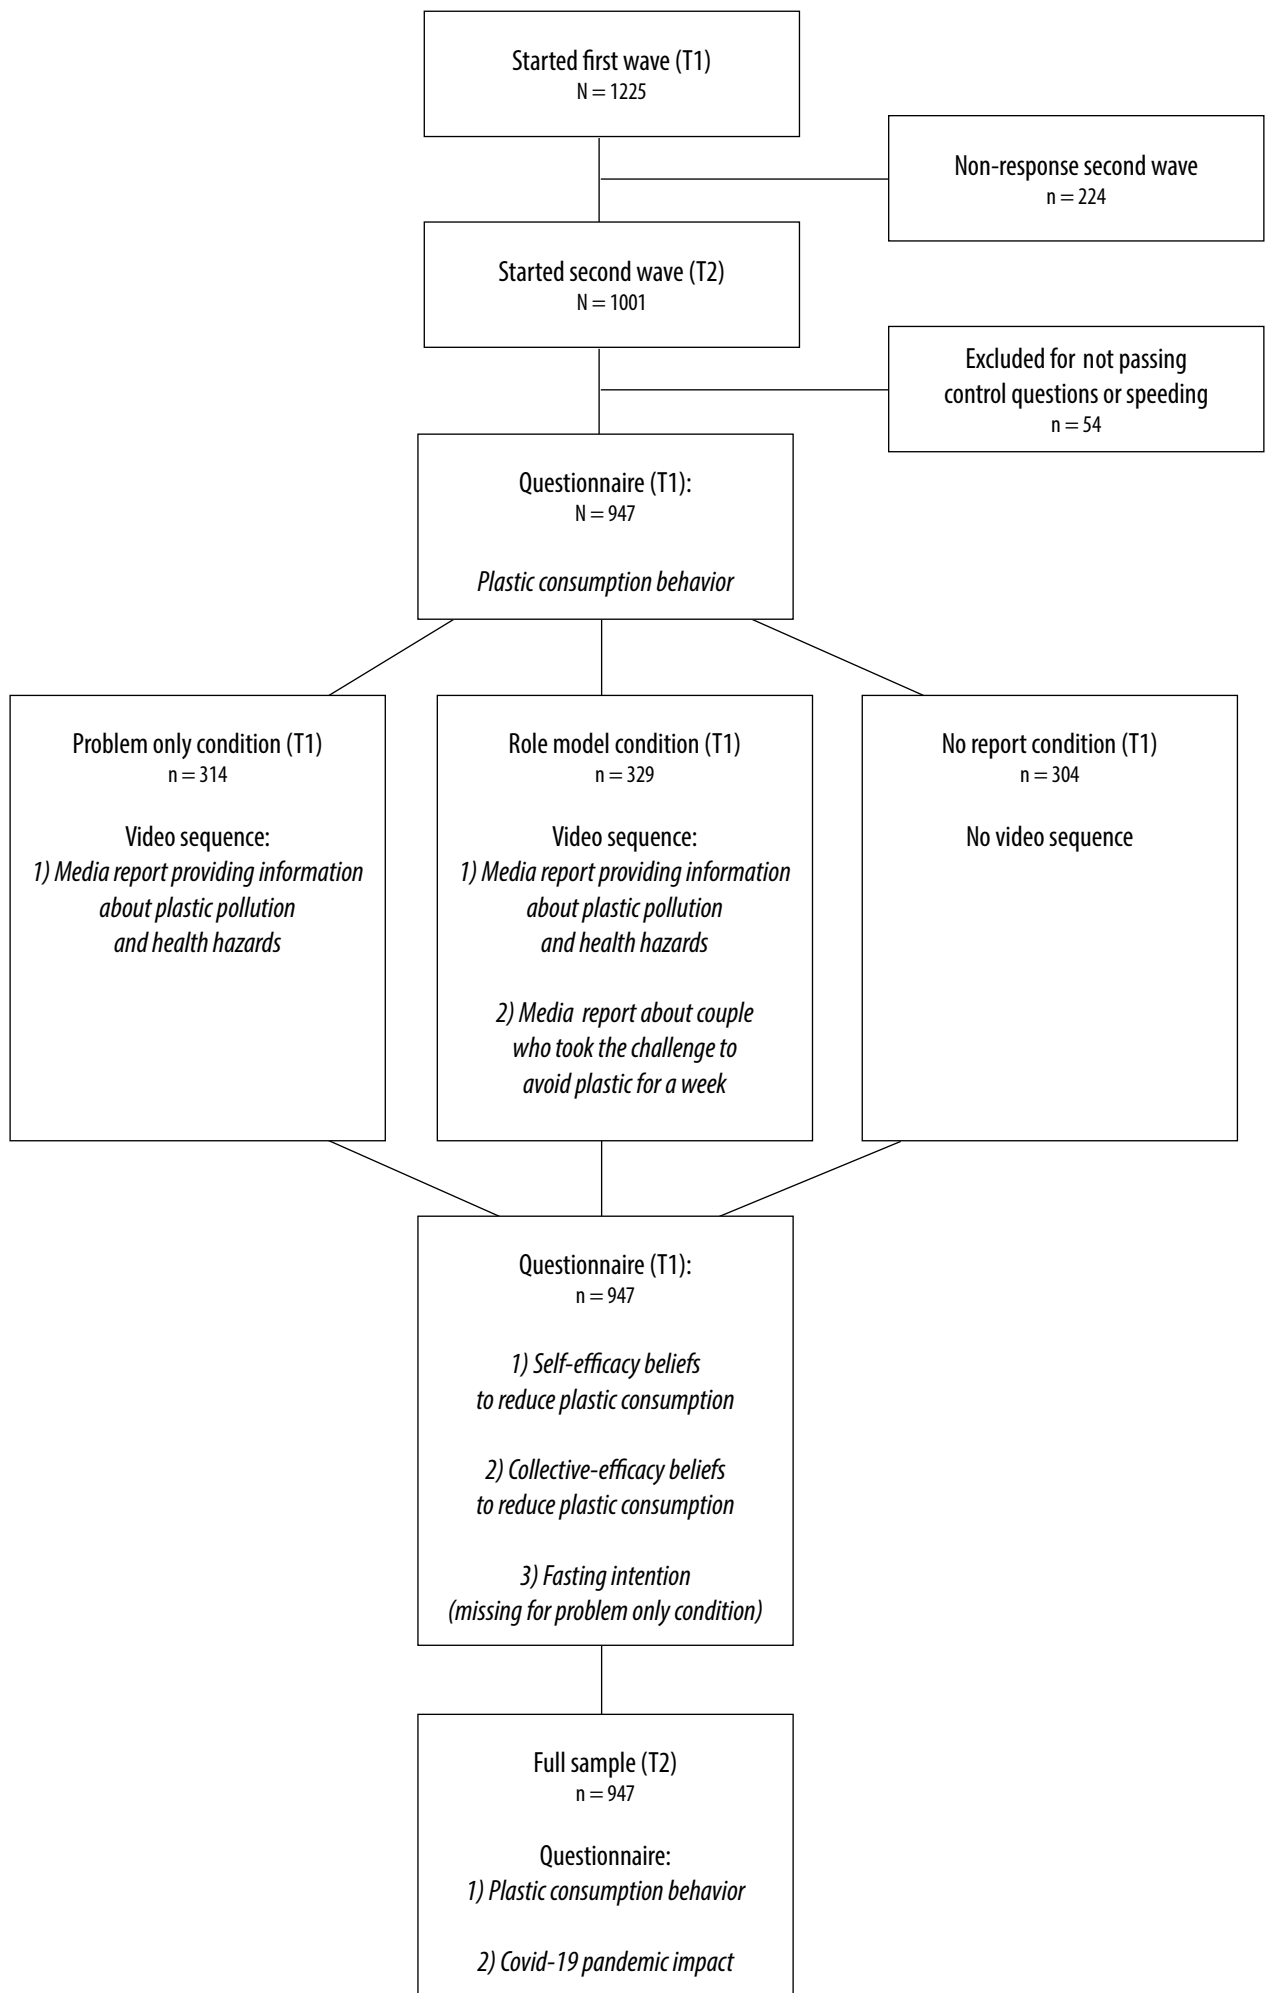

Supplement: s1 [file s1]
